# Supplementary material for: Comprehensively enhanced energy-storage properties in (Pb1−3x/2Lax)(Zr0.995Ti0.005)O3antiferroelectric ceramicsviacomposition optimization
Source: Royal Society of Chemistry journal article supplement (doi:10.1039/d1tc02972j), 2021-01-01
Supplement: d1tc02972j1.pdf [file d1tc02972j1.pdf]

## Supplementary information

### Comprehensively enhanced energy-storage properties in $(\text{Pb}_{1-3x/2}\text{La}_x)(\text{Zr}_{0.995}\text{Ti}_{0.005})\text{O}_3$ antiferroelectric ceramics *via* composition optimizing

Xiaohui Liu,<sup>a</sup> Tongqing Yang<sup>\*a</sup> and Weiping Gong<sup>b</sup>

<sup>a</sup>Key Laboratory of Advanced Civil Engineering Materials of the Ministry of Education, Functional Materials Research Laboratory, School of Materials Science and Engineering, Tongji University, 4800 Cao'an Road, Shanghai, 201804, China

<sup>b</sup>Guangdong Provincial Key Laboratory of Electronic Functional Materials and Devices, Huizhou University, Huizhou, 516001, Guangdong, China

E-mail: Yangtongqing@tongji.edu.cn

\*Corresponding Author.

## Experimental procedure

The high-quality slurry, the second ball-milled PLZT matrix powders, solvent (toluene/ethanol) and dispersant (phosphate ester) were ball-milled at 200 rpm for 12 h. Then, binder (polyvinyl butyral), plasticizer (polyethylene glycol-400/benzyl butyl phthalate) and homogenizer(cyclohexanone) were added and ball-milled for 12 h. And then, the bubbles were removed from the slurry in a defoaming machine. The prepared slurry with good liquidity was cast on a film-belt substrate with an initial thickness of 100  $\mu\text{m}$  by using a tape casting machine. The wet films were kept for 12 h at room temperature for desiccation. The ceramic thick films were cut to square with the diameter of 12 mm and the same thick films were pressed into square green bodies at 30 MPa and 70  $^{\circ}\text{C}$  by using a hot press mold. Finally, the samples were sintered to form ceramics. The thickness of testing sample before and after sintering is about 405  $\mu\text{m}$  and 350  $\mu\text{m}$ , respectively.

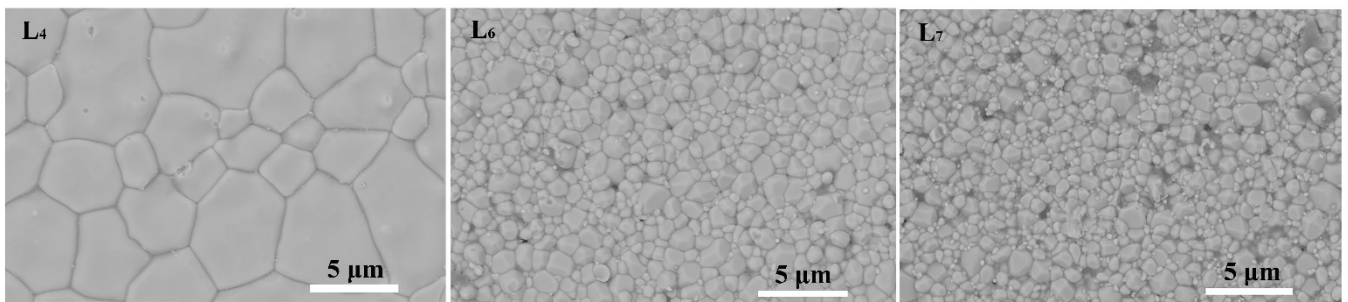

**Fig. S1.** The SEM micrographs of the L<sub>4</sub>, L<sub>6</sub> and L<sub>7</sub> ceramics.

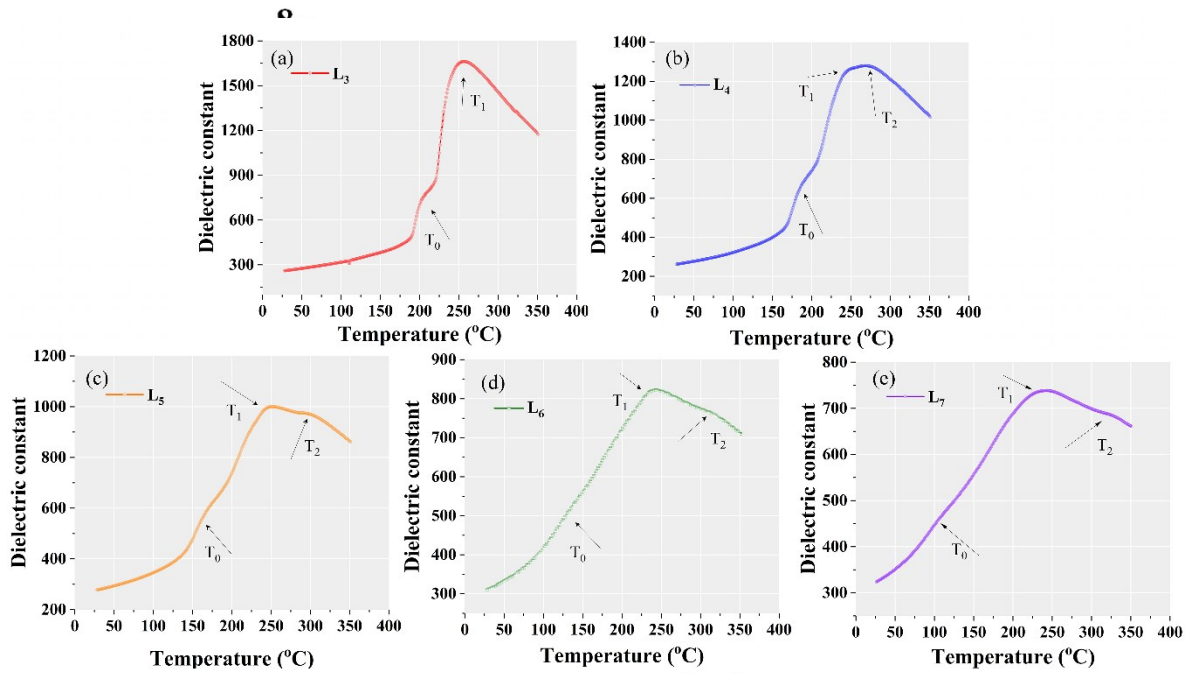

Fig. S2. Temperature dependence of the dielectric constant ( $\epsilon_r$ ) with different  $\text{La}^{3+}$  contents.

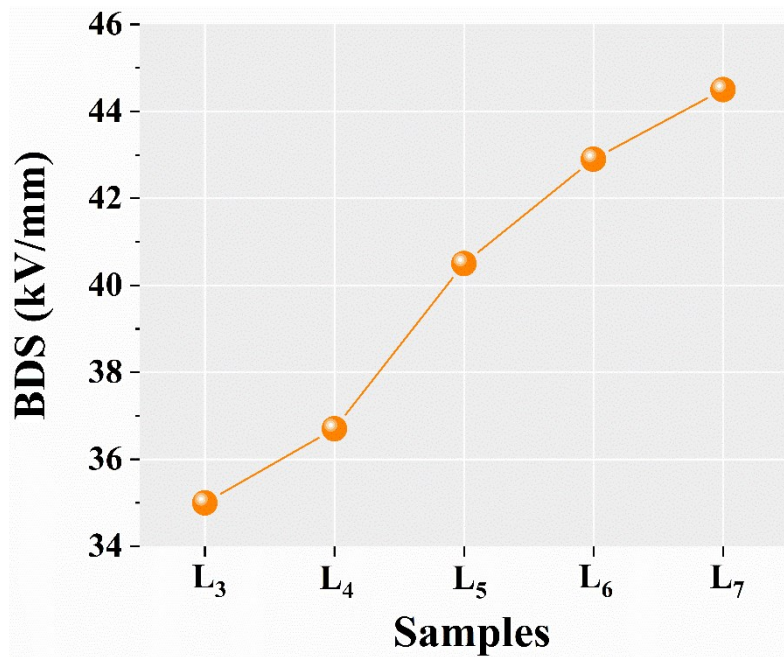

Fig. S3. The BDS of the PLZT ceramics with different  $\text{La}^{3+}$  contents.

Fig. S4. The discharge current waveforms of the L<sub>5</sub> ceramic under 38 kV/mm.
